# Supplementary material for: The Genus Heterogynis Rambur, 1866 (Heterogynidae, Lepidoptera): Congruence of Molecular, Morphological and Morphometric Evidence Reveal New Species in Serbia
Source: MDPI journal article supplement (doi:10.3390/insects14050455), 2023-05-11
Supplement: s1 [file s1]

|                            |     |                                                               |     |
|----------------------------|-----|---------------------------------------------------------------|-----|
| <i>Heterogynis_zikici</i>  | 2   | GGTGCTTGATCAGGTCTTTTAGGTACATCCTTAAGATTATTAATTTCGGGCTGAATTAAAT | 61  |
| <i>Heterogynis_serbica</i> | 20  | GGTGCTTGATCAGGTCTTTTAGGTACATCCTTAAGATTATTAATTTCGGGCTGAATTAAAT | 79  |
| <i>Heterogynis_zikici</i>  | 62  | AATCCTAATTCCCTTATTAACAATGACCAAATTTATAACTCAATTATTACTTCTCATGCT  | 121 |
| <i>Heterogynis_serbica</i> | 80  | AATCCTAATTCCCTTATTAACAATGATCAAATTTATAACTCAATTATTACTTCTCATGCT  | 139 |
| <i>Heterogynis_zikici</i>  | 122 | TTTATTATAAAttttttttATAGTTATACCAATTATAATTGGAGGATTTGGAAACTGATTA | 181 |
| <i>Heterogynis_serbica</i> | 140 | TTTATTATAAATTTTTTTTATAGTTATACCAATTATAATTGGAGGATTTGGAAACTGATTA | 199 |
| <i>Heterogynis_zikici</i>  | 182 | ATTCCTTTAATATTAGGATCACCTGATATAGCTTTTCCTCGTATAAATAATATAAGATTT  | 241 |
| <i>Heterogynis_serbica</i> | 200 | ATTCCTTTAATATTAGGATCACCTGATATAGCTTTTCCTCGTATAAATAATATAAGATTT  | 259 |
| <i>Heterogynis_zikici</i>  | 242 | TGATTACTCCCTCCTTCTCTCATCTTATTAATTTCCAGAAGAATAATCGAAAATGGAACA  | 301 |
| <i>Heterogynis_serbica</i> | 260 | TGATTACTCCCTCCTTCTCTCATCTTATTAATTTCCAGAAGAATGATCGAAAATGGAACA  | 319 |
| <i>Heterogynis_zikici</i>  | 302 | GGAACTGGATGAACTATTTATCCTCCTCTTTCTTCATATATTATTCATAGTAGAAGAACA  | 361 |
| <i>Heterogynis_serbica</i> | 320 | GGAACTGGATGAACTATTTATCCTCCTCTTTCTTCATATATTATTCATAGTAGAAGAACA  | 379 |
| <i>Heterogynis_zikici</i>  | 362 | GTTGATTTAACTATTTTCTCTTTACACCTTGCAGGTATTTCTTCAATTTTAGGAGCTATT  | 421 |
| <i>Heterogynis_serbica</i> | 380 | GTTGATTTAACTATTTTCTCTTTACACCTTGCAGGTATTTCTTCAATTTTAGGAGCTATT  | 439 |
| <i>Heterogynis_zikici</i>  | 422 | AACTTCATTACTACTATTATTAATATACGACCTAAAAATATATTATTAGATCAAATTCCT  | 481 |
| <i>Heterogynis_serbica</i> | 440 | AACTTCATTACTACTATTATTAACATACGACCTAAAAATATATTATTAGATCAAATTCCT  | 499 |
| <i>Heterogynis_zikici</i>  | 482 | TTATTTGTATGATCAGTTGGAATTACAGCTTTACTTTTATTACTTTCCTTACCTGTATTA  | 541 |
| <i>Heterogynis_serbica</i> | 500 | TTATTTGTATGATCAGTTGGAATTACAGCTTTACTTTTATTACTTTCCTTACCTGTATTA  | 559 |
| <i>Heterogynis_zikici</i>  | 542 | GCAGGAGCAATTACTATACTTTTAAACCGATCGAAATTTAAATACCTCATTTTTTGACCCT | 601 |
| <i>Heterogynis_serbica</i> | 560 | GCAGGAGCAATTACTATACTTTTAAACCGATCGAAATTTAAATACCTCATTTTTTGACCCT | 619 |
| <i>Heterogynis_zikici</i>  | 602 | ACTGGAGGA 610                                                 |     |
| <i>Heterogynis_serbica</i> | 620 | ACTGGAGGA 628                                                 |     |

BLAST Seq alignment

|             |         |       |
|-------------|---------|-------|
| Identity    | 606/609 | 99.5% |
| Query cover | 91%     |       |
| Gaps        | 0/609   | 0%    |
