# Supplementary material for: The Genus Heterogynis Rambur, 1866 (Heterogynidae, Lepidoptera): Congruence of Molecular, Morphological and Morphometric Evidence Reveal New Species in Serbia
Source: MDPI journal article supplement (doi:10.3390/insects14050455), 2023-05-11
Supplement: s1 [file s1]

1 *Genus Heterogynis* Rambur, 1837

2 *Heterogynis serbica* Stojanović, Galović, Terzin, Vidović, Ačanski & Orlović sp. n. (Figs. 1B, 3, 4A-  
3 G, 5CD, 6AB, 7, 8A,CD, 9CD, 10AB, 11B, 13)

4  
5 Description of the holotype

6  
7 *Holotype*. m (Fig. 3) SERBIA, Srebrenac, about 80 km west of the city of Niš and about 30 km south  
8 of the city of Kraljevo, Serbian Alps, Kopaonik mountain, 1600 m (Fig. 2), 6 July 2020, D. V.  
9 Stojanović (ILFE).

10  
11 Wing-span of the front wings was 17.4 mm, and the length of the body (dry specimen) was measured  
12 from the tip of the head to the end of the abdomen at 6.7 mm (Fig. 3A).

13 Head: forehead contains a ridge positioned between antennae. Ocelli in compound eyes are  
14 prominently convex.

15 The segments of the antennae bipectinate; the length of the antennae is about two-thirds of the length  
16 of the front wings. Antennae are made of 15 segments with two pairs of branches, separated at angle  
17 of 120 degrees from each other. Antennal segments contain a wide corridor between the pairs of  
18 branches. The branches are positioned away from the segment midline. The tip of antennae (top  
19 bipectinate antennae) without thickening (Fig. 4C, D) is present in *H. zikici* (Fig. 4H).

20 Wings: color is uniform gray-black.

21 Abdominal segments with well-sclerotized parts of tergites III–VII, narrowed distally with horned  
22 protrusions; sternites III–VII rounded, narrowed distally.

23 Male genitalia: Tegumen laterally angled on the top, nearly flat (8A), valvae in the widest region  
24 thickened, convex (Figs. 8A, C, 9C).

25 Aedeagus bent, vesicafilled with numerous, pale, scattered, small spikes (scobinate) (Figs.8D, 9D).

26 Cocoon, hairy, lightly woven (Fig. 3C).

27
