# Supplementary material for: The Genus Heterogynis Rambur, 1866 (Heterogynidae, Lepidoptera): Congruence of Molecular, Morphological and Morphometric Evidence Reveal New Species in Serbia
Source: MDPI journal article supplement (doi:10.3390/insects14050455), 2023-05-11
Supplement: s1 [file s1]

| identity               | <i>H. serbica</i> | <i>H. zikici</i> | <i>H. penella</i> | <i>H. sondereggeri</i> | <i>H. canalensis</i> | <i>H. segurana</i> | <i>H. affinis</i> | <i>H. yerayi</i> | <i>H. rakosy</i> | <i>H. dubia</i> |
|------------------------|-------------------|------------------|-------------------|------------------------|----------------------|--------------------|-------------------|------------------|------------------|-----------------|
| <i>H. serbica</i>      | 100               | 79.6             | 86.4              | 84.6                   | 85.5                 | 85.5               | 85.5              | 91.7             | 85.5             | 90.8            |
| <i>H. zikici</i>       |                   | 100              | 80.2              | 78.7                   | 79.4                 | 79.4               | 79.4              | 80.9             | 82.6             | 82.6            |
| <i>H. penella</i>      |                   |                  | 100               | 92.8                   | 94.7                 | 94.7               | 94.7              | 92.2             | 94.9             | 94.9            |
| <i>H. sondereggeri</i> |                   |                  |                   | 100                    | 95.1                 | 95.1               | 95.1              | 89.5             | 93               | 93              |
| <i>H. canalensis</i>   |                   |                  |                   |                        | 100                  | 100                | 100               | 90.4             | 93.9             | 93.9            |
| <i>H. segurana</i>     |                   |                  |                   |                        |                      | 100                | 100               | 90.4             | 93.9             | 93.9            |
| <i>H. affinis</i>      |                   |                  |                   |                        |                      |                    | 100               | 90.4             | 93.9             | 93.9            |
| <i>H. yerayi</i>       |                   |                  |                   |                        |                      |                    |                   | 100              | 95.4             | 95.4            |
| <i>H. rakosy</i>       |                   |                  |                   |                        |                      |                    |                   |                  | 100              | 94.9            |
| <i>H. dubia</i>        |                   |                  |                   |                        |                      |                    |                   |                  |                  | 100             |

Correlation of COI sequence identity among 10 *Heterogynis* species according to Emboss needle software [8].

| similarity             | <i>H. serbica</i> | <i>H. zikici</i> | <i>H. penella</i> | <i>H. sondereggeri</i> | <i>H. canalensis</i> | <i>H. segurana</i> | <i>H. affinis</i> | <i>H. yerayi</i> | <i>H. rakosy</i> | <i>H. dubia</i> |
|------------------------|-------------------|------------------|-------------------|------------------------|----------------------|--------------------|-------------------|------------------|------------------|-----------------|
| <i>H. serbica</i>      | 100               | 80.4             | 87.7              | 85.1                   | 86                   | 86                 | 86                | 92.5             | 86               | 90.8            |
| <i>H. zikici</i>       |                   | 100              | 81.4              | 79.1                   | 79.8                 | 79.8               | 79.8              | 82.1             | 82.6             | 82.6            |
| <i>H. penella</i>      |                   |                  | 100               | 94.3                   | 96.2                 | 96.2               | 96.2              | 93.6             | 96.3             | 96.3            |
| <i>H. sondereggeri</i> |                   |                  |                   | 100                    | 96.1                 | 96.1               | 96.1              | 90.9             | 93.5             | 93.5            |
| <i>H. canalensis</i>   |                   |                  |                   |                        | 100                  | 99.5               | 99.5              | 91.8             | 94.4             | 94.4            |
| <i>H. segurana</i>     |                   |                  |                   |                        |                      | 100                | 99.5              | 91.8             | 94.4             | 94.4            |
| <i>H. affinis</i>      |                   |                  |                   |                        |                      |                    | 100               | 91.8             | 94.4             | 94.4            |
| <i>H. yerayi</i>       |                   |                  |                   |                        |                      |                    |                   | 100              | 96.3             | 96.3            |
| <i>H. rakosy</i>       |                   |                  |                   |                        |                      |                    |                   |                  | 100              | 96.3            |
| <i>H. dubia</i>        |                   |                  |                   |                        |                      |                    |                   |                  |                  | 100             |

Correlation of COI sequence similarity among 10 *Heterogynis* species according to Emboss needle software [8].

#### COI Sequences among 10 *Heterogynis* species:

>BDE649-20\_ *Heterogynis penella*\_France (penella)

TLYFIFGAWSGLLGMSLSLLIRAE LNPN SLINNDQIYNSIITSHAFIMIFFMVMPI MIGGFGNWL IPLMLGSPDMAFPRMNNMSFL  
LPSSIILLISSMIENG TG TGWTIY PPLSSYFIHSSSTIDLTIFSLHLAGISSILGAINFITTIINMRPKNMSLDQIPLFVWSVGITALLLLSLP  
VLGAITMLLTDRLNTSFFDPSGG

>BDE650-20\_ *Heterogynis sondereggeri*\_Greece (penella)

TLYFIFGAWSGLLGTSLSLLIRAE LNPN SLINNDQIYNSIITSHAFIMIFFMVMPI MIGGFGNWL IPLMLGSPDMAFPRMNNMSFW  
MLPSSIILLISSMIENG TG TGWTIY PPLSSYIIHSSSTVDLTIFSLHLAGISSILGAINFITTIINMRPKNM LLDQIPLFVWSVGITALLLLS  
LPVLGAITMLLTDWNLNT

>BDE651-20\_ *Heterogynis canalensis*\_France (canelensis)

TLYFIFGAWSGLLGTSLLIRAE LNPNNSLINNDQIYNSIITSHAFIMIFFMVMPI MIGGFGNWLIPLMLGSPDMAFPRMNNMSFW  
LLPPSLILLISSSMIENG TGTGWTIYPPLSSYIIHSSSTVDLTIFSLHLAGISSILGAINFITTIINMRPKNMSPNQIPLFVWSVGITALLLLSL  
PVLAGAITMLLTDRNLNTLFFDX

>BDE652-20\_Heterogynis segurana\_Spain (penella)

TLYFIFGAWSGLLGTSLLIRAE LNPNNSLINNDQIYNSIITSHAFIMIFFMVMPI MIGGFGNWLIPLMLGSPDMAFPRMNNMSFW  
LLPPSLILLISSSMIENG TGTGWTIYPPLSSYIIHSSSTVDLTIFSLHLAGISSILGAINFITTIINMRPKNMSPNQIPLFVWSVGITALLLLSL  
PVLAGAITMLLTDRNLNTLFFDX

>BDE656-20\_Heterogynis affinis\_Spain (affinis)

TLYFIFGAWSGLLGTSLLIRAE LNPNNSLINNDQIYNSIITSHAFIMIFFMVMPI MIGGFGNWLIPLMLGSPDMAFPRMNNMSFW  
LLPPSLILLISSSMIENG TGTGWTIYPPLSSYIIHSSSTVDLTIFSLHLAGISSILGAINFITTIINMRPKNMSPNQIPLFVWSVGITALLLLSL  
PVLAGAITMLLTDRNLNTLFFDX

>PHLAH828-12\_Heterogynis yerayi\_Spain (paradoxa)

TLYFIFGAWSGLLGTSLLIRAE LNPNNSIINNDQIYNSIITSHAFIMIFFMVMPI MIGGFGNWLIPLMLGSPDMAFPRMNNMSFWL  
LPPSLILLISSSMIENG TGTGWTIYPPLSSYIIHSSSTVDLTIFSLHLAGISSILGAINFITTIINMRPKNMLLDQIPLFVWSVGITALLLLSLP  
LAGAITMLLTDRNLNTSFFDPAGGGDPILYQHFL

>PHLAH047-12\_Heterogynis rakosy\_Romania (penella)

TLYFIFGAWSGLLGTSLLIRAE LNPNNSLINNDQIYNSIITSHAFIMIFFMVMPI MIGGFGNWLIPLMLGSPDMAFPRMNNMSFW  
LLPPSLILLISSSMIENG TGTGWTIYPPLSSYIIHSSSTVDLTIFSLHLAGISSILGAINFITTIINMRPKNMLLDQIPLFVWSVGITALLLLSL  
PVLAGAITMLLTDRNLNTSFFDPTGGGDPX

>LEFIA1167\_10\_Heterogynis dubia\_Slovenia (penella)

TLYFIFGAWSGLLGTSLLIRAE LNPNNSLINNDQIYNSIITSHAFIMIFFMVMPI MIGGFGNWLIPLMLGSPDMAFPRMNNMSFW  
LLPPSLILLISSSMIENG TGTGWTIYPPLSSYIIHSSSTVDLTIFSLHLAGISSILGAINFITTIINMRPKNMLLDQIPLFVWSVGITALLLLSL  
PVLAGAITMLLTDRNLNTSFFDPTGGGDPX

>Heterogynis\_serbica (internal ID 1CCDZAG273, GenBank ID\_MW286118; Serbia)

GAWSGLLGTSLLIRAE LNPNNSLINNDQIYNSIITSHAFIMIFFMVMPI MIGGFGNWLIPLMLGSPDMAFPRMNNMSFWLLPPSL  
ILLISSSMIENG TGTGWTIYPPLSSYIIHSSSTVDLTIFSLHLAGISSILGAINFITTIINMRPKNMLLDQIPLFVWSVGITALLLLSLPVL  
AITMLLTDRNLNTSFFDPTGGGDPILYQHFWFFGHPEL

>Heterogynis\_zikici (BDE648-20, GenbankID, MW128372, Serbia)

TLYFIFGAWSGLLGTSLLIRAE LNPNNSLINNDQIYNSIITSHAFIMIFFMVMPI MIGGFGNWLIPLMLGSPDMAFPRMNNMSFW  
LLPPSLILLISSSMIENG TGTGWTIYPPLSSYIIHSSSTVDLTIFSLHLAGISSILGAINFITTIINMRPKNMLLDQIPLFVWSVGITALLLLSL  
PVLAGAITMLLTDRNLNTSFFDPTGGTLYFIFGAWSGLLGTSLLIRAE LNPNNSLINNDQIYNSIITS
